# Supplementary material for: Forced motion simulations of vortex-induced vibrations of wind turbine blades – A study of sensitivities
Source: Copernicus journal article supplement (doi:10.5194/wes-2023-65), 2023-07-03
Supplement: Supplementary file [file wes-2023-65-AC1-supplement.pdf]

# Answer to reviewer 1

Christian Grinderslev<sup>1</sup>, Felix Houtin-Mongrolle<sup>2</sup>, Niels Nørmark Sørensen<sup>3</sup>, Georg Raimund Pirrung<sup>3</sup>, Pim Jacobs<sup>2</sup>, Aqeel Ahmed<sup>4</sup>, and Bastien Duboc<sup>4</sup>

<sup>1</sup>Department of Wind and Energy Systems, Technical University of Denmark, 2800, Kgs. Lyngby, Denmark

<sup>2</sup>Siemens Gamesa Renewable Energy, Prinses Beatrixlaan 800, 2595BN Den Haag, Netherlands

<sup>3</sup>Department of Wind and Energy Systems, Technical University of Denmark, Risø Campus, 4000, Roskilde, Denmark

<sup>4</sup>Siemens Gamesa Renewable Energy, 685 Avenue de l'Université, Saint-Etienne-du-Rouvray, 76801, France

**Correspondence:** Christian Grinderslev (cgrinde@dtu.dk)

The authors would like to thank the reviewer for the thorough review and many good points made, which will improve the paper significantly. In the following, the reviewers comments will be given in black font, while the answers from authors are given in blue.

5 The manuscript presents a sensitivity analysis of different CFD model fidelities and parameters to simulate VIV of a wind turbine blade under forced motion. The results obtained with two CFD models (EllipSys3D, Ansys CFX) and 5 turbulence models are compared for both low and high inclination angles. VIV is a topic of increasing interest for wind turbine blades of increasing lengths and different modelling approaches exist in the literature. As such, the present work is of relevance to the field. The methodology is also scientifically sound. The main outcome of the paper is that URANS is not suitable for simulating VIV of blades with low inclination angles.

10 The authors agree that one main outcome of the paper is that URANS is not suitable for VIV simulations at low inclination angles, but would also like to additionally emphasize that another finding is the significant sensitivity to grid sizes for the scale resolving turbulence models. This is something that does not seem to be well known in the field.

Although the work is interesting and relevant, the main weakness of the manuscript is that the scope of the work, and discussion of the results, is rather limited for a paper on its own. Also, the choices made in the work are not always justified.

15 I suggest addressing the following comments/suggestions in the revisions of the manuscript.

- The present approach of prescribing the VIV motion is justified based on previous work using a similar setup. However, in this work, it is also shown that some of the previous work was using insufficient spatial resolution to properly resolve the flow phenomena and associated effective power. Can these work still support the idea that forced motion is realistic enough? The previously published work comparing the forced motion with coupled FSI simulations (Grinderslev et. al 2022) was done with high inclination angles only, and by that the spatial resolution was sufficient, as shown in the present paper. Through the PRESTIGE project, many simulations with both FSI coupling and forced motion for various spatial resolutions and both high and low inclination angles have been conducted on various wind turbine designs, and it's been found in general that the forced motion method for all tested VIV cases works very well. This is due to the fact that all work has been done with fairly low wind speeds (5-30 m/s), meaning that the effect of the aerodynamic forces on the mode shapes and natural frequencies is low. For other phenomena, such as stall-induced vibrations at higher wind speeds or in the case where the fluid density is much higher,

20  
25

the forced motion approach is likely not as good an option as the resulting mode shapes and frequencies will be significantly altered.

- Line 141: no checks for orthogonality, why is that? The reason for not doing checks on the orthogonality during runtime, is that in EllipSys3D the orthogonality does not affect the accuracy of the solution, as long as the solution is still able to converge  
30 deeply. The effect of very skewed cells could, however, be seen in numerical instabilities, which could make simulations crash. The current orthogonality correction of the normals close to the surface with a blending into the original mesh farther from the surface, works very well, even for shape optimization problems.

- The mesh sizes used in both codes are different. This is briefly described in Sec 1.4. However, it's still not fully clear why the first cell size is larger with CFX whilst it is mentioned that its numerical schemes are of lower accuracy. Please explain in  
35 more details. In Sec 2.1.2, it is mentioned that a limit of 5 inner iterations is used for CFX. This is also smaller than with the other code. This is not justified nor explained. These choices are made to fit usual choices for the specific solvers. EllipSys3D, used at DTU, works very efficiently, and a very small first cell height does not lead to convergence issues and do not add significantly to the computational time. This is not the same for Ansys CFX, which struggles more with the very thin cells near the surface. That being said, the very low first cell height used for the EllipSys3D setup is an overkill, as the  $y^+$  is much lower  
40 than 1, but it is the common choice for blade resolved simulations in EllipSys3D. The amount of used subiterations is based on experience by the specific users for the two solvers on getting the residuals low efficiently. In EllipSys3D it is often chosen to have a high maximum number of subiterations, however, if set up correctly, these will only be used for the first short part of the simulation to get residuals low and then afterwards, for the remainder of the simulation, less subiterations are needed per time step. The reason for the Ansys CFX setup working well with a higher time step as well as lower allowable subiterations,  
45 is likely due to the mesh differences and the computational schemes. However, since EllipSys3D is computationally very efficient, it has not been found necessary to investigate this further.

- Line 234 mentions the numerical damping in loosely coupled FSI. Can the authors further quantify this, based on this work or previous work? When first developing the FSI framework at DTU, Heinz (2013) studied various coupling strategies and their impact on energy conservation and loads. It was concluded that the loose coupling scheme was sufficiently good for  
50 wind energy purposes, due to the large ratio between structural mass and mass of the surrounding air, and the small time steps used in these simulations. The authors believe that the difference between HAWCSTAB2 results and former FSI results is due to postprocessing, as the aforementioned FSI results were found by analysis of multiple time responses and fitted for a good overall match see (Grinderslev, 2022). HAWCSTAB2 results are also based on purely structural mode shapes, while the FSI results are aeroelastic, which were found to be similar to the structural ones for this wind speed but not exactly the same.

- The figure legends (e.g. Fig 7) mention case names such as P100I30. This only becomes clear later in the manuscript (i.e. at the start of Section 2.2.1). It would be beneficial to introduce this naming in the text or in a table at an earlier stage in the manuscript. This is a very good point, the naming is now introduced earlier in the text, where the definition of inclination and  
55 pitch are given as well.

- In Sec 2.1.2, the setups are presented but the results shown in Fig 8 are not really discussed. The EllipSys3D results are also not monotonically converging with decreasing time step. This deserves further explanation. A figure has been added with  
60

the accumulated power in time, in order to emphasize better the time dependency, which also looks more as expected between the lower time steps. The non-monolithic behaviour in the average accumulated power, is likely due to the averaging over a cycle and the very non-linear behaviour of the physics. Power is a very hard parameter to converge, due to it being a product of both force and the phase between motion and force. A small change in the latter have a high effect on the total power. For  
65 this reason a higher relative uncertainty, than for instance a usual force analysis, has been accepted here. In terms of vibration assessments, the uncertainty in injected aerodynamic power is low compared to the uncertainty in actual structural damping of the wind turbine blades. More comments on this have been added to the manuscript.

Minor changes.

- Line 76: add reference at end of sentence. References added
- 70 - Line 90 of 18m/s → up to 18m/s? Changed to "for a wind speed of 18 m/s". We have studied other winds speeds as well with the same conclusion, but those results are not published.
- Line 155: unfinished sentence corrected
- Line 255: low5 (typo) corrected

Once again, thank you very much for you comments and suggestions to the article!

## Answer to reviewer 2

Christian Grinderslev<sup>1</sup>, Felix Houtin-Mongrolle<sup>2</sup>, Niels Nørmark Sørensen<sup>3</sup>, Georg Raimund Pirrung<sup>3</sup>, Pim Jacobs<sup>2</sup>, Aqeel Ahmed<sup>4</sup>, and Bastien Duboc<sup>4</sup>

<sup>1</sup>Department of Wind and Energy Systems, Technical University of Denmark, 2800, Kgs. Lyngby, Denmark

<sup>2</sup>Siemens Gamesa Renewable Energy, Prinses Beatrixlaan 800, 2595BN Den Haag, Netherlands

<sup>3</sup>Department of Wind and Energy Systems, Technical University of Denmark, Risø Campus, 4000, Roskilde, Denmark

<sup>4</sup>Siemens Gamesa Renewable Energy, 685 Avenue de l'Université, Saint-Etienne-du-Rouvray, 76801, France

**Correspondence:** Christian Grinderslev (cgrinde@dtu.dk)

The authors would like to thank the reviewer for the thorough review and many good points made, which will improve the paper significantly. In the following, the reviewers comments will be given in black font, while the answers from authors are given in blue.

5 The article describes forced motion simulations of a clamped wind turbine blade for two different inflow conditions and with two different computational fluid dynamics codes. Several turbulence models, grid resolutions and time step sizes are investigated, with analysis of the aerodynamic power on the blade. The article is thus a sensitivity study using existing codes, but provides interesting guidelines for vortex-induced vibration simulations of wind turbine blades.

10 Line 69-70: The forced motion (or forced response) method has also been used extensively for gas turbines, with references going back at least 20 years. It would be good to mention that this type of method only works well if the fluid does not modify the vibration frequency significantly compared to in-vacuum, so typically only for air and gasses. This is indeed correct, and even for air the assumption only works for low wind speeds, otherwise the aeroelastic mode shapes and frequencies vary too much from the structural ones. This has been emphasized in the introduction to the forced motion method Section 1.1

15 Line 117: The time discretization scheme for EllipSys3D seems to be missing. EllipSys uses an implicit 2nd order backward iterative time-stepping (or dual time-stepping) method. In each global time-step the equations are solved in an iterative manner, using under-relaxation. This information has been added to the paper.

20 Line 127-139: The grid deformation technique is described in some detail, but the text is still vague and I would not be able to reproduce the results based on this text. Can references be added? The tuning of the parameters is not documented. Some extra description including the tuning parameters of the blending has been added to the description. There is yet no specific reference to the deformation routine of EllipSys3D, but some extra explanations can be found in the thesis of Antariksh C. Dicholkar. (<https://doi.org/10.11581/dtu.00000240>) part II sec 1.1.2.

25 Line 159: Why is the first cell height 10x larger for CFX than for EllipSys3D? The flow conditions are the same and similar turbulence models are applied. The cell size used in the EllipSys3D setup is indeed unnecessarily low, as the y+ is much lower than 1 due to the low flow velocity. The reason for the choice, is that the cell height is the common practice for operational cases in EllipSys3D, where it is needed. It does not add significantly extra computational cost as EllipSys3D is very efficient on long stretched cells. This is not in the same way the case for Ansys CFX, which gain more by increasing the cell height, though

still within the limit of having  $y^+ < 1$ . Admittedly, it would have been more obvious to also use 1E-5m for the EllipSys3D setup as well, however the authors deem that the consequence is low.

Line 207: How many periods (n) were used to calculate the total aerodynamic power? How does this quantity change as a function of the number of periods? Were the first periods omitted from the averaging? Only the fully converged results were used to calculate the power, and tests were made by changing the number of periods to ensure that the average per cycle did not change significantly. The number of full cycles needed to obtain a converged average power, varies especially with inclination angle, as high inclination angles often have more steady state vortices and thus require less cycles than the lower inclination cases. In all cases, at least five cycles were used for the averaging. This information has been added to the manuscript.

Line 276-278: The effect of the convergence tolerance is mentioned, but not clearly described. Show in a table the effect of the tolerance on the result. The dependence on convergence criteria has not been documented or analysed in a structured manner, and would require an excessive number of extra simulations to do. Instead the statement is based on experiences gained through a vast amount of VIV simulations during the past years during the PRESTIGE project and related activities. For EllipSys3D it has been found through experience, that reducing the normalized residuals by five orders from the initial guess of constant flow is sufficient.

Line 282: The result of a time step size study is preferably a time-varying quantity, instead of a time-average. A figure of the total power over time for the various time steps has been added to the figure.

Line 292: Figure 9 is not mentioned in the text. Reference added

Line 294: The text indicates as if the small scale vortices are shed directly from the blade, while they typically develop in the wake. Please clarify whether these small scale vortices are present already very close to the blade (so shed by the blade) or whether they develop in the wake, from larger vortices that become unstable (so develop rather than shed). This is a very good point. The vortices are created in the near wake of the blade from the shear layers that occur at the leading and trailing edges. You are right that the vortices are not created along the surface. This has been corrected in the text.

Line 317: Figure 13 is not mentioned in the text. Reference added

Minor comments:

Line 38: vortex => Vortex Corrected

Line 123: surface.The => surface. The Corrected

Caption Figure 3: clarity => clarity. Corrected

Line 128: exploring => exploiting Corrected

Line 155: Incomplete sentence Corrected

Line 208: force => spanwise force density Corrected to "spanwise force distribution" which is our usual term.

Line 222:  $F_{STRUC}$  is only defined further, below Equation (7). Furthermore, this symbol F was previously used for force density, so confusing to use it also as dissipation factor.  $F_{STRUC}$  is a naming chosen in a former related paper (Grinderslev et al. 2022), and for that reason it is chosen to keep the naming here to be consistent. The factor has now been introduced after Equation (5), where it is used, to avoid confusion.

Line 228: 5 => (5) Corrected

Line 242: SAS,SBES => SAS, SBES Corrected

Line 255: low5 => low Corrected

Line 316:  $U_0$  was used for amplitude, now  $A_{tip}$ , so maybe use  $U_0, tip$ . Changed  $U_0$  to A instead so that the convention from (Grinderslev et al 2022) is kept.

65 Once again, thank you very much for you comments and suggestions to the article!

# Forced motion simulations of vortex-induced vibrations of wind turbine blades - A study of sensitivities

Christian Grinderslev<sup>1</sup>, Felix Houtin-Mongrolle<sup>2</sup>, Niels Nørmark Sørensen<sup>3</sup>, Georg Raimund Pirrung<sup>3</sup>, Pim Jacobs<sup>2</sup>, Aqeel Ahmed<sup>4</sup>, and Bastien Duboc<sup>4</sup>

<sup>1</sup>Department of Wind and Energy Systems, Technical University of Denmark, 2800, Kgs. Lyngby, Denmark

<sup>2</sup>Siemens Gamesa Renewable Energy, Prinses Beatrixlaan 800, 2595BN Den Haag, Netherlands

<sup>3</sup>Department of Wind and Energy Systems, Technical University of Denmark, Risø Campus, 4000, Roskilde, Denmark

<sup>4</sup>Siemens Gamesa Renewable Energy, 685 Avenue de l'Université, Saint-Etienne-du-Rouvray, 76801, France

**Correspondence:** Christian Grinderslev (cgrinde@dtu.dk)

**Abstract.** Vortex-induced vibrations on wind turbine blades are a complex phenomenon not predictable by standard engineering models. For this reason, higher fidelity computational fluid dynamics (CFD) methods are needed. However, the term CFD covers a broad range of fidelities, and this study investigates which choices have to be made when wanting to capture the VIV phenomenon in a satisfying degree. The method studied is the so-called forced motion (FM) approach, where the structural motion is imposed on the CFD blade surface through modeshape assumptions rather than fully coupled two-way fluid structure interaction. In the study, two independent CFD solvers, EllipSys3D and Ansys CFX, are used and five different turbulence models of varying fidelities are tested. Varying flow scenarios are studied with respectively low to high inclination angles, which determine the component of the flow in the spanwise direction. In all scenarios, the cross-sectional component of the flow is close to perpendicular to the chord of the blade. It is found that the low and high inclination angle scenarios, despite having a difference equivalent to up to only thirty degrees azimuth, have quite different requirements of both grid resolution and turbulence models. For high inclination angles, where the flow has a large spanwise component from tip towards root, satisfying results are found from quite affordable grid sizes, and even with URANS  $k-\omega$  turbulence the result is quite consistent with models resolving more of the turbulent scales. For low inclination, which has a high degree of natural vortex shedding, the picture is opposite. Here, even for scale resolving turbulence models, a much finer grid resolution is needed. This allows to capture the many incoherent vortices ~~shed from the blade~~, which have a large impact on the coherent vortices, which inject power into the blade or extract power.

It is found that a good consistency is seen using different variations of the higher fidelity hybrid RANS/LES turbulence models, like IDDES, SBES and  $k-\omega$  SAS models, which agree well for various flow conditions and imposed amplitudes.

This study shows that extensive care and consideration are needed when modelling 3D VIVs using CFD, as the flow phenomena, and thereby solver requirements, rapidly change for different scenarios.

## Acronyms

- CFD - Computational Fluid Dynamics

- VIV - vortex-induced Vibration
- FM - Forced Motion
- 25 – FSI - Fluid-Structure Interaction
- LES - Large Eddy Simulation
- IDDES - Improved Delayed Detached Eddy Simulation
- URANS - Unsteady Reynolds-Averaged Navier-Stokes
- SAS - Scale-Adaptive Simulation
- 30 – SBES - Stress-blended eddy simulation
- QUICK - Quadratic Upstream Interpolation for Convective Kinematics
- AoA - Angle of attack
- DTU - Technical University of Denmark
- SGRE - Siemens Gamesa Renewable Energy
- 35 – IEA - International Energy Agency
- PGL - Parametric Geometry Library
- VCO - Vertex-Centered-Orthogonality

~~vortex-induced~~ Vortex-induced vibrations (VIVs) on wind turbine blades are a phenomenon gaining relevance as wind turbines become larger and more flexible. When the turbine is not in operation, due to for instance grid loss, maintenance, in storm conditions or during erection, the blades can see wind from various directions, which can result in large angles of attack close to perpendicular to the chord. In this range of wind directions, deep stall with a high degree of vortex shedding can occur, meaning that a risk of lock-in between structural modes and shedding frequencies increases.

As VIVs are directly depending on vortex shedding frequency and phase between the corresponding loads and motion velocity, engineering models struggle to compute the phenomenon. It becomes especially problematic as the blade shape, by twist and chord length, changes over the blade span, making a simple Strouhal relationship analysis difficult. For this reason, high fidelity methods such as computational fluid dynamics (CFD) are needed. Examples of this are the works of Horcas et al. (Horcas et al., 2022a, 2020, 2022b), who studied wind turbine blade VIVs through fluid-structure interaction (FSI) simulations coupling CFD with a structural solver. It was shown that branches of VIVs can be found for various flow angles, defined by so-called pitch and inclination angles. This flow direction definition is also used in the present study and is depicted in Figure 1. As seen, pitch angle,  $P$ , is the angle between flow and the chord of the root airfoil section. The pitch angle is defined similar



to a standard geometrical angle of attack, reaching  $P=90^\circ$  when the wind vector strikes the pressure side perpendicularly to the chord at the root. Inclination,  $I$ , is the relative vertical angle between the inflow wind and the plane intersecting the root section (i.e. the x-z plane in Fig. 1).  $I$  is positive when the spanwise component of the wind flow is from tip to root, and zero when the wind strikes the blade perpendicularly to the span. It is important to notice that various combinations of wind turbine settings, i.e. blade pitch, yaw and azimuth, can result in identical inclination and pitch angles, meaning these parameters are more general than a single turbine setting. In the following, flow cases will be named based on their pitch and inclination angles, i.e.  $P100I30$  meaning a pitch angle of  $P=100^\circ$  and an inclination angle of  $I=50^\circ$ .

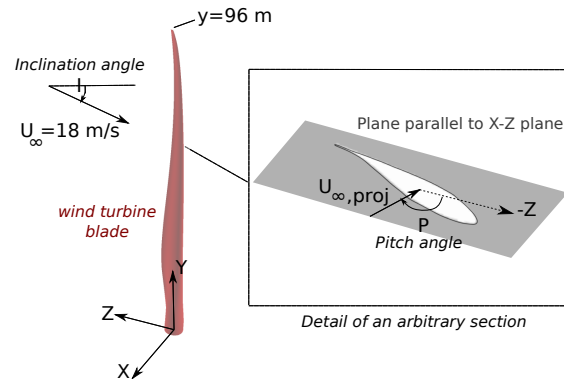

**Figure 1.** Definition of inclination and pitch angles. Reproduced from Horcas et al. (2022b).

The positions of the VIV branches depend on blade shape, structural properties and flow velocity. As shown in (Horcas et al., 2022a, 2020), changing the shape of the blade by tip and/or flap alterations moves the regions of VIVs, however, it does not seem plausible, within realistic alternations, to remove the VIV risk entirely, as the branches rather seem to shift towards other flow angles and/or velocities.

In a recent study, Grinderslev et al. (2022) used the same setup as Horcas et al. and showed that it is feasible, to omit the coupling with the structural solver, and replace it by an analytical imposed motion of the structural mode. At least when considering single wind turbine blades which are rigidly clamped at the root. The approach is to simulate the forced motion for various defined amplitudes revealing a picture of the power injection by the aerodynamic loads. By comparison to the dissipated power from structural damping an equilibrium vibration state can then be estimated. The benefit of such an approach is that no coupling framework is needed, and for a specific simulation the approach is likewise faster, as no time for build-up of vibration is needed. This latter benefit, however, disappears when multiple amplitude simulations are needed if the vibration development is of interest.

The forced motion method is no new concept, but has been used extensively on especially cylinder VIVs (Placzek et al., 2009; Viré et al., 2020) but also for airfoils in 2D (Skrzypiński et al., 2014; Hu et al., 2021).

In the present study, the approach of forced motion (FM) CFD analysis of VIVs is studied further in various aspects. The influence of modelling schemes, turbulence models, grids and more is studied using two well established CFD solvers; one

used and developed by the Technical University of Denmark (DTU), EllipSys3D (Sørensen, 1995; Michelsen, 1992), and  
75 one commercial code used by Siemens Gamesa Renewable Energy (SGRE) Ansys CFX (v. 2021, R1, CFX (2021)). The  
aim is to provide knowledge about good practices when simulating VIVs for wind turbine blades. The present work uses the  
IEA10MW blade (Bortolotti et al., 2019) also studied in the aforementioned FSI studies by ~~Horeas and Grinderslev et. al.~~  
[Horcas et al. \(2022b\)](#) and [\(Grinderslev et al., 2022\)](#).

The study shows that the chosen modelling approach has large effects on the computed power input for cases with low to  
80 medium inclination angles, where uncorrelated natural shedding occurs. For cases with high inclination angles, the sensitivity  
is found to be much lower, as the defined blade motion controls the flow pattern more in this region.

## 1 Methodology

As two different codes are used, variations of grid methods, convective schemes, turbulence models and much more can be  
studied. [The setups of the two solvers are based on the experiences, common practices and computational resources of the users](#)  
85 [\(DTU use EllipSys3D, SGRE use Ansys CFX\), however, with a desire of being able to capture the same physics.](#) Common in  
all simulations is the use of forced motion CFD simulations as described below in subsection 1.1. In the following subsections,  
the fluid solver codes will be described along with the chosen models. Finally, the analysis methods will be described.

### 1.1 Forced motion method

In order of doing high-fidelity modelling of VIVs without using a structural coupling framework, the forced motion method  
90 (FM) is used. Here, it is assumed that the structural response of the blade seen during VIVs can be simplified to being purely  
the structural modes. [This assumption works well, when the mode shapes and natural frequencies are not altered significantly](#)  
[by the surrounding flow, which is the case for the current study with low speed air flow.](#) In these simulations, the first edgewise  
mode has been chosen, as this is the mode being provoked by the investigated flow scenarios when using fully coupled FSI  
simulations (Horcas et al., 2022b; Grinderslev et al., 2022). In these studies the assumption of having close to purely structural  
95 modes has been validated for ~~wind speeds a~~ [wind speed](#) of 18m/s. For high wind speeds, the assumption might not hold as the  
aeroelastic mode shape moves away from the structural one.

The aeroelastic model of the IEA10MW wind turbine is publicly available from Bortolotti et al. (2019) and in the present  
study the aeroelastic stability tool HAWCSTAB2 (Hansen, 2004) was used on said model to extract the modes. The first  
edgewise mode has a frequency of 0.67Hz and the edge and flapwise motion components of the modeshape are depicted in  
100 Figure 2, along with the corresponding polynomials fitted for use with the CFD solvers. The phase between flapwise and  
edgewise amplitude is such that the maximum tip deformation towards the pressure side of the blade occurs at the same time  
as the maximum deformation towards the leading edge. The amplitude used in the present study is 1m in edgewise direction,  
except for amplitude sweeps presented in Sec.2.3.

For the specific study, some assumptions are made to enable the FM approach. Firstly, as mentioned, it is assumed that the  
105 structural first edgewise mode shape is the only motion present. This means that no contribution from static loads nor buffeting

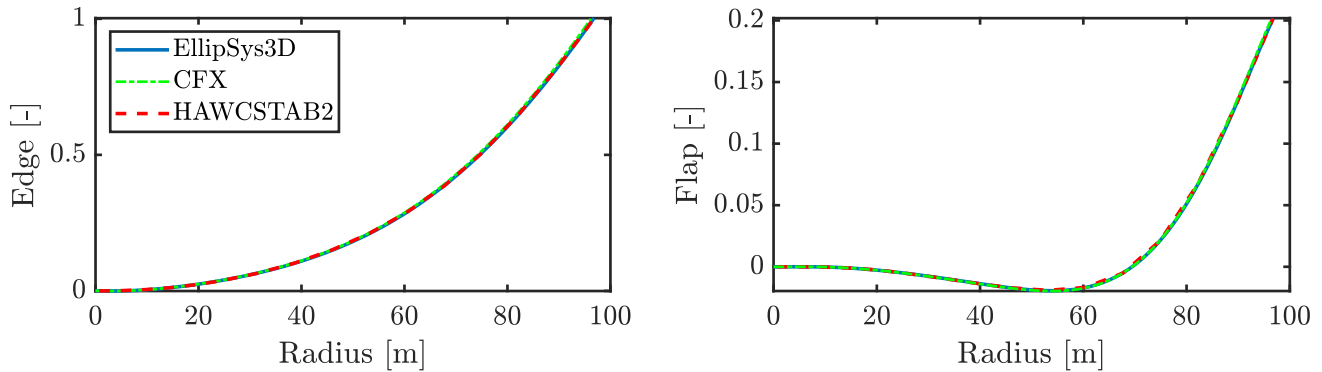

**Figure 2.** First edgewise mode shape of blade from HAWCSTAB2 along with polynomial fit used in forced motion simulations. The effect of the torsional component, which was less than 0.5 degree at the tip for 1 m edgewise deflection, was found to be negligible in Grinderslev et al. (2022). The maximum edgewise deflection to the leading edge occurs together with the maximum flapwise tip deflection towards the pressure side.

loads are included in the motion. This assumption aligns well with what was found in previous studies using fully coupled FSI (Horcas et al., 2022b; Riva et al., 2022). Another assumption made, is the disregard of the torsional part of the mode shape. This assumption is done for practical reasons in terms of imposing motion in the CFD solvers. The effect has again been tested with FSI simulations which include torsion, and it was found that the consequence of not considering torsion is marginal.

110 In the present case, the torsional component is less than half a degree at the tip for a 1m amplitude. This is, however, not a general conclusion, and is something that should be assessed for the specific blade and flow scenario considered. One reason that torsion has little effect in the present study is the angles of attack (AoA) studied, which are close to perpendicular to the chord. Here, the aerodynamics are less sensitive to small changes of AoA than for instance at stall onset.

## 1.2 EllipSys3D setup

115 The EllipSys3D CFD solver (Sørensen, 1995; Michelsen, 1994, 1992), is a finite volume code based on structured grids, that solves the incompressible Navier Stokes equations with RANS, LES or hybrid turbulence equations. The solution algorithm is based on the SIMPLE algorithm in combination with Rhie-Chow interpolation to avoid pressure decoupling. [A second order implicit backward iterative time stepping \(dual time stepping\) is used as the temporal discretization scheme.](#)

In this study, simulations are based on unsteady Reynolds averaged Navier Stokes (URANS)  $k - \omega$  SST (Menter, 1993) along with the higher fidelity  $k - \omega$  based improved delayed detached eddy simulations (IDDES) (Gritskevich et al., 2012) for better resolution of turbulent structures ~~shed from the~~ [created in the near wake of the](#) blade.

120

For the URANS simulations the QUICK convective scheme is used, while for IDDES a combination of QUICK (in RANS region) and fourth order central difference (in LES region) is used as described by Strelets (2001).

### 1.2.1 EllipSys3D Grids

125 Various grids have been tested in the present study. All surface grids are based on the DTU in-house Parametric Geometry  
Library (PGL) tool (Zahle, 2022), and volume grids are created through hyperbolic extrusion from the surface grid to a spher-  
ical domain with a radius of  $\approx 700\text{m}$  ( $\approx 7$  blade lengths), using the mesh tool HypGrid3D (Sørensen, 1998). Multiple grid  
refinements have been tested to study the sensitivity of the VIVs to the resolved vortices. The baseline mesh used if other-  
wise not stated, has 512 cells spanwise along the blade, 256 cells chordwise and 256 cells normal to the surface. The total  
130 number of cells for the baseline mesh is 35.6M cells. This mesh is finer than that used in previous publications (Horcas et al.,  
2020, 2022b; Grinderslev et al., 2022), which in this study was found necessary for certain flow scenarios, see Section 2.1. The  
first cell size normal to the surface is set to  $1\text{e-}6\text{m}$  which ensures a  $y^+$  of much less than one. This cell height is a common  
choice in EllipSys3D for operational cases and is kept here, despite being unnecessarily low for the wind speed used, as the  
additional computational cost is low.

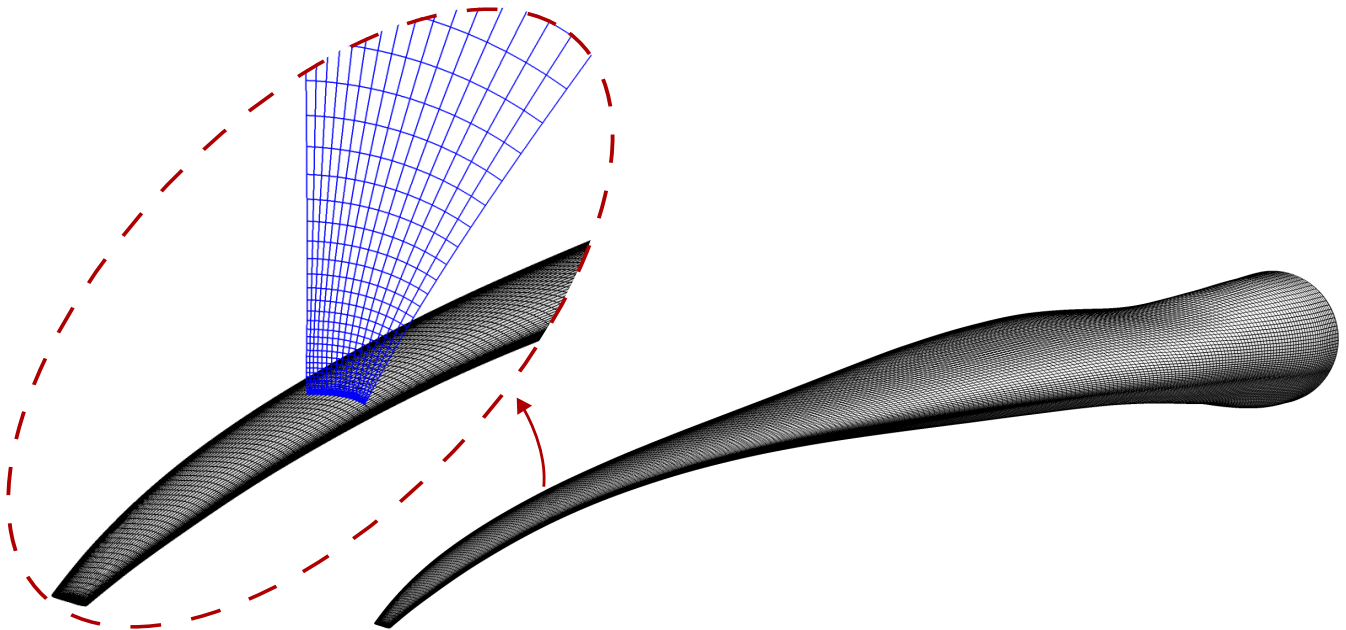

**Figure 3.** Surface grid and volume mesh hyperbolically grown from surface for EllipSys3D. Only every second line is shown for clarity.

135 The grid deformation procedure in the EllipSys3D simulations is based on an explicit algebraic algorithm, transferring the  
deformation of the surface grid into the volume grid by a blending approach exploring-exploiting the block structured nature  
of the computational grid.

The deformed grid is computed by enforcing the Cartesian translation and deformation of the surface grid points along the  
grid lines normal to the surface. To avoid generating highly non-orthogonal grids at the surface, the normal grid lines are rotated  
140 according to present surface normal direction. Using blending functions in the direction normal to the surface it is assured that

the grid translation and rotation are only enforced in the proximity of the surface of the geometry. This ensures that the original grid quality is conserved at the surface, while preserving the original grid far away from the surface. In between the surface proximity region and the far-field region, a blending region is present where the grid quality risks deterioration in the case of large deformations if the blending is not adequately tuned. Typically, the surface deflections are enforced far away from the surface, while the rotations are limited to a region close to the surface. The blending is based on hyperbolic tangent functions, using the normalized curve-length along the grid lines normal to the surface. The procedure can easily be tuned for specific cases by calibrating the blending function constants for a severe static deformation using a steady state computation.

The blending function for translational deformations is  $B_{def} = \tanh(1 - \tanh(a * (\frac{s}{S})^b))$ , with  $s$  being the curve length from the surfaces of the specific grid line and  $S$  being its total length. Factors  $a$  and  $b$  are the tuning parameters which in this specific study were set as 1500 and 3.0 respectively. The orthogonality blending is done similarly  $B_{orth} = \tanh(1 - \tanh(c * (\frac{s}{S})^d))$ , with tuning factors  $c$  and  $d$  here set to 15000 and 1.05 respectively. To assure that the grid is not degenerating, a simple check for negative cells volumes is performed after each grid deformation. No checks for orthogonality are performed.

### 1.3 Ansys CFX setup

The Ansys CFX library (CFX, 2021) gathers a set of solvers to resolve different multi-physical fluid dynamics. Only the incompressible Navier Stokes equations with URANS and hybrid URANS/LES formulation are used in this work. Ansys CFX is a finite volume code based on structured, unstructured, and hybrid grids. Ansys CFX uses a coupled solver (CFX-Solver, 2021) combined with Rhie-Chow interpolation, which solves the hydrodynamic equations as a single system differing from the SIMPLE algorithm. The solver uses a Multigrid accelerated Incomplete Lower Upper (Raw, 1996) factorization technique for solving the discrete system of linearized equations. It relies on an iterative process to approach the exact solution.

In this study, the simulations are based on URANS with a  $k-\omega$  SST (Menter, 1993), SST Scale Adaptive Simulation (SAS)(Egorov et al., 2010), and Stress Blended Eddy Simulations (SBES)(Menter, 2018). SAS and SBES aim for a better resolution of the turbulent structures by either decreasing the added turbulence modeling or relying on LES turbulence models. They both rely on shielding functions to delimit volumes where a “close-to” LES formalism is used.

For  $k-\omega$  and SAS, the numerical schemes used are second-order in space and second-order backward Euler in time. For SBES, the spatial numerical scheme is changed to a blended-bounded Central Difference Scheme (Leonard, 1991; Jasak et al., 1999) (Leonard, 1991), switching between second-order central difference scheme and first-order up-wind scheme, based on the local velocity convection boundedness criterion (Jasak et al., 1999).

#### 1.3.1 Ansys CFX Grids

For the CFX grid, a combination of structured and unstructured grids is used, to keep more control near the blade while exploiting the unstructured expansion of the grid further away. The different meshes are generated using Pointwise v22.2, allowing the control of the structured mesh. The first cell size normal to the surface is set to 1e-5m with a growth rate of 1.07 which ensures a  $y^+$  of one or less. Several grid resolutions are investigated in this work where only the structured part is refined, i.e. the background unstructured cell size is kept constant. The baseline structured mesh used, if otherwise not stated,

has 500 cells spanwise, 544 cells chordwise and 152 cells normal to the surface. This adds up to  $\approx 50\text{M}$  cells total - 48M  
175 in the structured region and 2M in the unstructured region. The mesh quality is evaluated based on the cell length ratios in  
the chordwise and spanwise direction, keeping them below 1.5. In the structured region, near the blade, the Vertex-Centered-  
Orthogonality (VCO, area-weighted average of the orthogonality angles associated with each bounding face of the dual mesh  
control volume around the vertex. A 90 degrees VCO represents perfect orthogonality) is kept higher than 20 degrees. For  
the unstructured region, a Delaunay triangulation algorithm is used and a smooth transition from structured to unstructured  
180 is achieved by using a growth rate of 1.07 for the tetrahedron. An overview of the mesh is given in Fig. 4.a. The domain is  
square with 500m side lengths ( $\approx 5$  blade lengths) and the blade is placed in the center. Side boundaries are velocity inlets and  
pressure outlets.

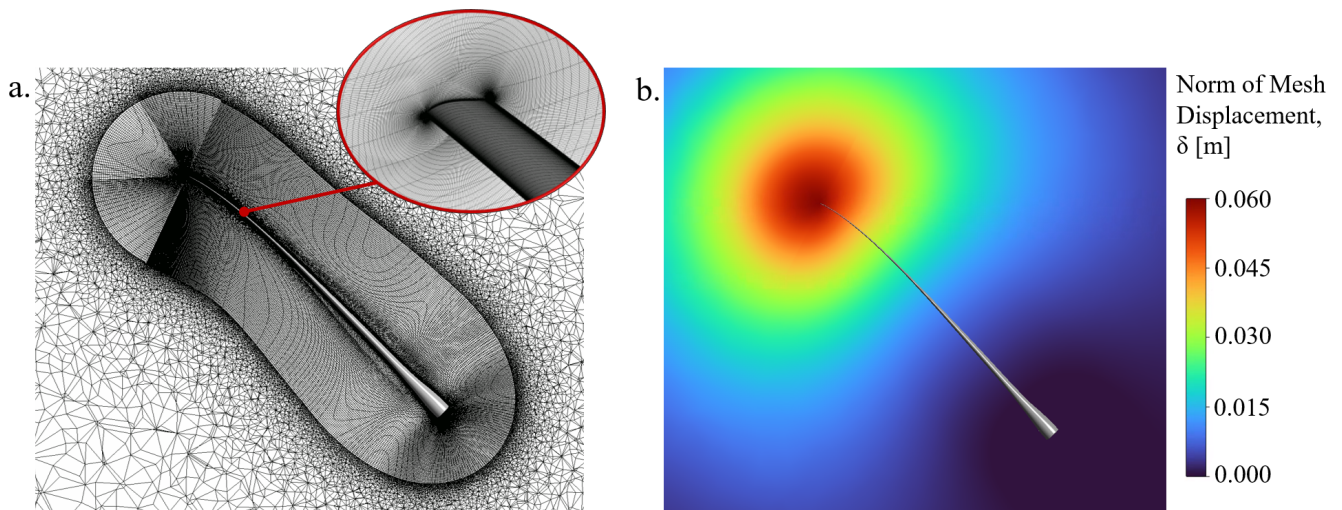

**Figure 4.** a. Near blade volume grid in CFX setup. Structured mesh is grown from the blade surface and switched to unstructured at  $\approx 20\text{m}$   
from the surface. b. Diffusion of the mesh displacement norm emanating from the blade surface at a given timestep.

To take into account the motion of the selected mode shape the mesh is deformed periodically at the mode frequency. The  
mesh deformation is computed only during the initialization step as the displacement is imposed. This deformation is computed  
185 by diffusing the displacement registered on the blade boundary to the neighbouring mesh cells. To prevent any cell from folding  
over, a mesh stiffness is defined. This stiffness is set to increase near the blade boundaries at a cubic rate and after a distance to  
the blade boundary of 1m. The obtained mesh displacement at a given timestep is depicted in Fig. 4.b. The VCO and negative  
cell volumes are monitored to ensure that the grid remains suited for resolving the flow.

#### 1.4 Setup differences

190 The main difference between the two used CFD codes is their discretization methods, EllipSys3D being a structured solver,  
while CFX uses unstructured grids. Both of these have pros and cons; the unstructured grid approach being more flexible



in terms of grid manufacturing, however, often resulting in a slower performance. In this work, the grid close to the surface was chosen to be structured for the CFX solver as well, to avoid a too rapid dissipation of the shed vortices, found when using an unstructured approach. Further from the surface, the unstructured grid, rapidly expands, limiting the cell count, i.e. ensuring faster computations. For the structured grid in EllipSys3D an expansion of cells also happens when moving far from the surface. The number of cells used also varies between the two setups, based on grid sensitivity studies, see more in Sec. 2.1. This is partly a consequence of the convective schemes having different orders of accuracy, being 4th-order accurate in EllipSys3D while being 2nd-order accurate in CFX.

Domain shapes differ between the two being spherical for EllipSys3D and square for the CFX setup. This should have no impact, as boundary conditions are far from the considered blade.

The turbulence models implemented in the two solvers differ, but should have similar capabilities of capturing the vortex shedding with varying degrees of accuracy from URANS  $k-\omega$  SST (Menter, 1993) in both solvers, to the higher fidelity hybrid RANS/LES models like IDDES (Gritskevich et al., 2012; Menter et al., 2003; Shur et al., 2008) in EllipSys3D and SAS (Egorov et al., 2010) and SBES (Menter, 2018) in CFX.

Finally, the blade surface shows discrepancies at the tip. As the meshing methodology differs between the two setups, the tip cap surface used in CFX is flat, while it is rounded in EllipSys3D. This introduces an 8 cm difference corresponding to less than 0.1% of the total blade length, which showed a low impact on the aerodynamic spanwise power distribution introduced in the following section.

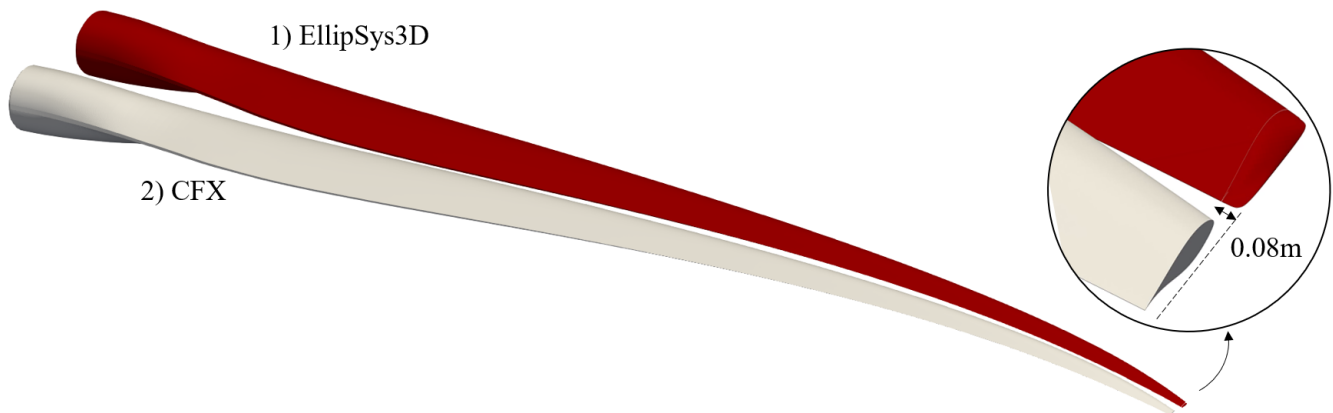

**Figure 5.** Discrepancies of the blade surface at the tip between the two setups: EllipSys3D (rounded tip) and CFX (flat tip).

## 1.5 Analysis

### 210 1.5.1 Aerodynamic power

In this paper, aerodynamic power will be defined as positive when injecting power into the structural system, while negative when damping the structural response. When calculating aerodynamic power, the mean power over  $n$  full motion cycles is considered, see Eqs. 1 and 2. Through one motion period, there might be both positive and negative contribution of power, and so the total power over the full cycle needs to be considered to assess whether the structural response is excited or damped.

215 The power,  $P_{A,TOT}$ , is total power for the full blade, meaning that power is found spanwise,  $P_{A,SPAN}$ , and integrated over the length of the blade.

$$P_{A,SPAN}(y) = \frac{1}{T \cdot n} \int_{t=t_0}^{t_0+T \cdot n} F(y) \dot{u}(y) dt, \quad (1)$$

$$P_{A,TOT} = \int P_{A,SPAN}(y) dy, \quad (2)$$

$t_0$  is the start time of the integration,  $T$  is the time for one motion period and  $n$  the number of full cycles considered. In this work, a minimum of five full cycles, after convergence is obtained, is used to analyse the aerodynamic power.  $F(y)$  and  $\dot{u}(y)$  are the force-spanwise force distribution and structural velocity along the blade span  $y$ .

When considering the risk of VIVs, it is important to realize that the total power  $P_{A,TOT}$  is the driving factor. If this is negative, the vibration is damped, despite there being positive values of  $P_{A,SPAN}$  at some spanwise positions.

### 1.5.2 Assessment of VIV amplitudes

225 As with the aerodynamic power injected to the structure for a given amplitude, the corresponding power dissipated by structural damping can be found and compared to the aerodynamic power to assess whether the operating point is stable or not.

Structural damping is estimated using modal analysis. For single degree of freedom systems, the energy  $E_D$  dissipated by damping during one cycle of harmonic vibration of frequency  $\omega$  is given by (Paz, 2012)

$$E_D = \int_0^{2\pi/\omega} (c\dot{u}) du = \int_0^{2\pi/\omega} c\dot{u}^2 dt \quad (3)$$

230 Given  ~~$\dot{u}(t) = U_0 \omega \cos(\omega t - \phi)$~~  the  $\dot{u}(t) = A \omega \cos(\omega t - \phi)$ ,  $A$  being the amplitude, the equation (3) becomes

$$E_D = c \underline{U_0} A^2 \omega^2 \int_0^{2\pi/\omega} \cos^2(\omega t - \phi) dt = \pi c \omega \underline{U_0} A^2 \approx 2\pi \zeta k \underline{U_0} A^2 \approx 2\pi \zeta \omega^2 m \underline{U_0} A^2 \quad (4)$$



where  $\zeta = c/c_{cr} \ll 1$  is the damping ratio,  $\omega = \sqrt{k/m}\sqrt{1-\zeta^2} \approx \sqrt{k/m}$  is the damped natural frequency and  $c_{cr} = 2\sqrt{km}$  is the critical damping. Parameters  $m$ ,  $k$  and  $c$  are respectively; mass, stiffness and structural damping.

To obtain the power dissipation the energy needs to be divided by the period  $T = 1/f = 2\pi/\omega$ .

$$235 \quad P = c/2\omega^2 \underline{U_0 A}^2 \approx \omega \zeta k \underline{U_0 A}^2 \approx \omega^3 \zeta m \underline{U_0 A}^2 = F_{STRUC} \underline{U_0 A}^2, \quad (5)$$

where  $F_{STRUC}$  is a structural damping dissipation factor as also described in (Grinderslev et al., 2022).

An equivalent single degree of freedom system for a given mode can be constructed using modal analysis, thus, the stiffness and damping are replaced by modal stiffness and modal damping for a given mode to compute the energy dissipated when the structure moves by a unit amplitude with a certain mode shape.

240 With eigen matrix  $[V]$  containing in each column the eigen vector  $\{V_i\}$  for a given mode  $i$

$$\begin{aligned} [M_{modal}] &= [V]^T [M] [V] \\ [C_{modal}] &= [V]^T [C] [V] \\ [K_{modal}] &= [V]^T [K] [V], \end{aligned} \quad (6)$$

where the first edgewise eigenvector has been scaled to correspond to 1 m blade tip deflection in the edgewise direction. Thus the effective mass, damping and stiffness values to be used in equation 5-(5) are

$$\begin{aligned} m_{eff} &= [M_{modal}](i, i) \\ c_{eff} &= [C_{modal}](i, i) \\ k_{eff} &= [K_{modal}](i, i) \end{aligned} \quad (7)$$

245 It is also evident from equation (5) that structural damping is a quadratic function of the amplitude of the displacement.

Using the method above and HAWCSTAB2 (Hansen, 2004), the structural damping dissipation factor  $F_{STRUC}$  of the blade undergoing the first edgewise mode was found to **495.8 W/m<sup>2</sup>**. This deviates from the value of 540 W/m<sup>2</sup> that was found in previous FSI studies (Grinderslev et al., 2022). The reason for this deviation is likely a combination of **numerical damping in the loosely coupled FSI framework calculation method** and deviations of the aeroelastic deflection shapes observed in the FSI simulations from the purely structural modeshapes investigated here. **However, considering the Finally, numerical damping in the loosely coupled FSI framework could play a role, however, this effect was found to be low by Heinz et al. (2016) when developing the framework. Considering the** uncertainties in the structural damping of wind turbine blades, the agreement within 10 % is **found** acceptable.

## 2 Results

### 255 2.1 Grid and time dependency

#### 2.1.1 Grid sensitivity

Various grid configurations have been tested in the present study using varying turbulence models. In the higher fidelity turbulence models (SAS, SBES and IDDES), the resolved length scale in the LES region depends on the grid cell size itself, meaning that large changes of the grid can lead to large changes of the resulting flow. Two separate grid studies were conducted. First, 260 the EllipSys3D solver using the IDDES turbulence models with different inclination angles and largely varying grid resolutions. The grid setups tested are defined in Table 1 and go from the coarsest case, *E-A*, of  $\approx 12$ M cells to the finest case, *E-E*, of 2281M cells. Obviously, a grid with more than two billion cells, is more an academic case than a practical case, due to the corresponding immense computational cost for both running and post-processing. Luckily, it is also found unnecessarily fine in the current study, which is depicted in Fig. 6, showing the total power for various flow inclinations as result of grid. For all 265 the cases, a 1m amplitude has been imposed. As seen, the resulting power becomes close to stable from grid case *C* and finer, and the sensitivity seems to be highest for the lower inclination cases with  $30^\circ$  and  $40^\circ$  inclination. For the higher inclination cases  $I = 50^\circ$  and  $I = 60^\circ$ , the sensitivity is in general low, which was also found in previous studies by Horcas et al. (2022b).

Note that for the sake of visibility, the figure has number of cells spanwise on the x-axis, despite cases *D* and *E* having varying numbers of cells in normal and chord-wise directions as well, for the sake of grid quality.

270 Physically, it makes sense that lower inclination cases are more sensitive to grid and turbulence model, than higher inclination cases, as the amount of chaotic natural shedding in [low5-low](#) inclination cases is quite high. For higher inclinations, there seems to be much more shedding that is correlated with the motion of the blade, meaning larger more ordered vortices are resolved. For the flow case of  $I = 30^\circ$ , the importance on considering the grid is evident, as the CFD predicts positive power injection for the coarse grid setups *A* and *B*, but negative power for the finer cases. In the specific case, this is conservative, as one would 275 "over design" the turbine if considering it in the design. However, it is not a given that the opposite cases could not exist, where the positive injection of power would only be captured for finer grid setups as is almost the case for  $I = 40^\circ$ .

This finding indicates that the previously found VIV risk mapping from (Horcas et al., 2022b), shows false positives in the low inclination region around 30 degrees, as the grid in that study was coarser than what is here found to be necessary. However, the main risk region found in the mapping at higher angles of inclination is valid with these findings.

280 Secondly, a grid study using various turbulence models was conducted using the CFX setup and the turbulence models URANS, SAS and SBES for the inclination angle of  $I = 30^\circ$ , which as mentioned was found quite grid sensitive for the EllipSys3D setup. The grid setups for the CFX cases are described in Table 2. The results are shown in Fig. 7 along with the corresponding IDDES cases from EllipSys3D.

As seen, the behaviour of the higher fidelity models, SAS, SBES and IDDES is very similar and find a large dependency of 285 the grid setups. The URANS case, however, does not see this dependency but appears to overshoot on the aerodynamic power injection for all grids considered.

**Table 1.** Grid refinement cases for the EllipSys3D setup.

|     | Spanwise | Chordwise | Normal | Total number of cells  |
|-----|----------|-----------|--------|------------------------|
| E-A | 160      | 256       | 256    | $\approx 12\text{M}$   |
| E-B | 256      | 256       | 256    | $\approx 18\text{M}$   |
| E-C | 512      | 256       | 256    | $\approx 35\text{M}$   |
| E-D | 1024     | 512       | 512    | $\approx 285\text{M}$  |
| E-E | 2048     | 1024      | 1024   | $\approx 2281\text{M}$ |

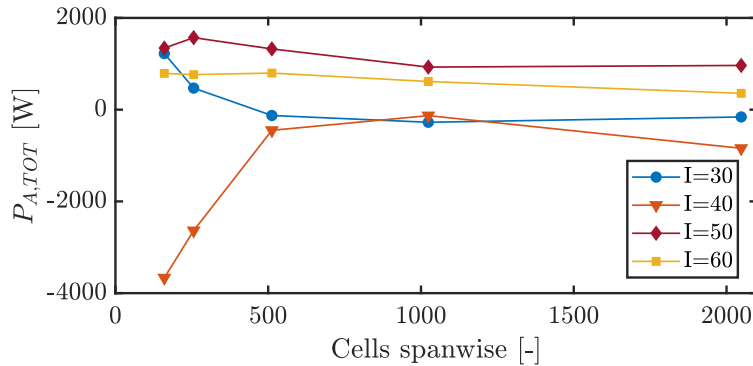

**Figure 6.** Total aerodynamic power per cycle,  $P_{A,TOT}$ , for varying grid refinements and flow inclination angles.  $P = 100^\circ$  for all cases.

**Table 2.** Grid refinement cases for the CFX setup. Total number of cells is given for the structured part of the mesh.

|     | Spanwise | Chordwise | Normal | Total number of cells |
|-----|----------|-----------|--------|-----------------------|
| C-A | 250      | 272       | 152    | $\approx 11\text{M}$  |
| C-B | 500      | 272       | 152    | $\approx 23\text{M}$  |
| C-C | 500      | 544       | 152    | $\approx 48\text{M}$  |

### 2.1.2 Time step sensitivity

The sensitivity to time step size for the EllipSys3D simulations were studied for the flow case *P100I50* with a 1m amplitude. The baseline time step was set to  $6\text{e-}3$  seconds, which was found suitable in the earlier work by Horcas et al. (2022b) and results in 250 time steps per motion cycle for the first edgewise mode. The time step was varied to half and double the baseline,

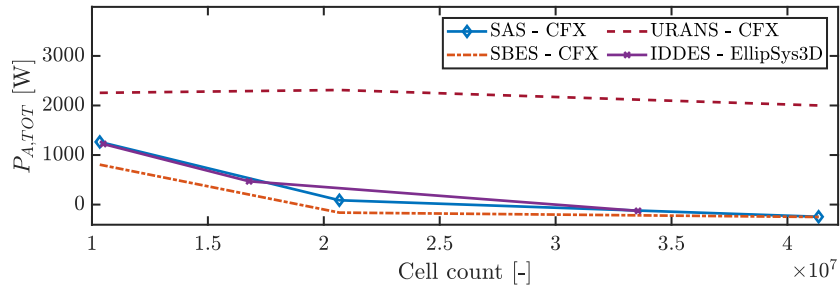

**Figure 7.** Total aerodynamic power per cycle,  $P_{A,TOT}$ , for varying grid refinements and turbulence models. Flow case  $P100I30$

and the resulting power injection distribution along the span is given in Figure 8. ~~It is worth mentioning that~~ has in general been found that a deep convergence is needed to capture the power injection well, as it is directly dependent on both force amplitude and the phase between motion and force. In the EllipSys3D setup, each time step has between 5 to 20 inner iterations, which dynamically changes based on the convergence of the flow residuals. ~~It has in general been found that a deep convergence is~~  
 295 ~~needed to capture the power injection well.~~ This means that various time steps could suffice if the number of inner iterations ensure a sufficiently deep convergence.

For the CFX setup, a similar sensitivity is performed. The baseline time step is less strict, reaching  $1.5e-2$  seconds, resulting in 100 time steps per motion cycle for the same first edgewise mode. It is then reduced by two and four, where the resulting power injection along the span is shown in Figure 8. In a similar way to EllipSys3D, the time step inner iterations is fluctuating  
 300 according to the flow residuals convergence. A limit of 5 inner iterations was used for CFX. As seen in Fig. 8, the two solvers obtain ~~only marginally different~~ very similar results when using time steps half the size of the baseline choices. When considering power as the objective, total convergence of results is hard to obtain, as it is extremely sensitive to the phase between the found forces and the motion velocity as well as the force amplitude. In this case the difference between the accumulated power over a full cycle is less than 7% between the two smallest time steps for the EllipSys3D setup and even  
 305 less for the CFX setup. This is deemed acceptable for the purpose of this investigation, as the uncertainty in the corresponding dissipated power from structural damping is likely much higher. As seen in the mid panels of Fig. 8, the main difference in accumulated power stems from the range between 40m to 70m along the span, where the majority of aerodynamic power is inputted. Closer to the tip, the power aligns for all cases.

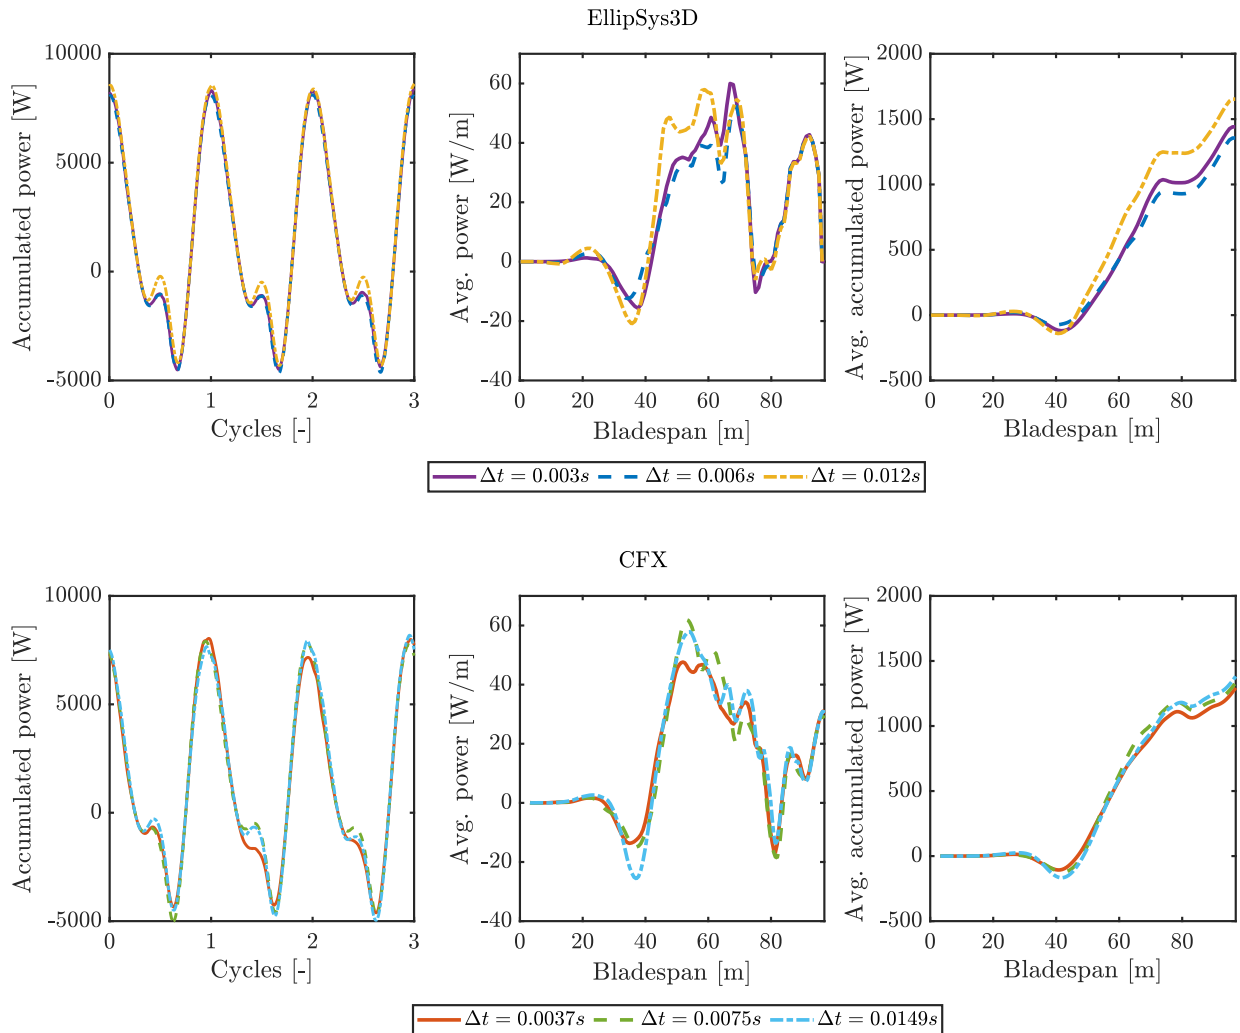

**Figure 8.** Spanwise-Accumulated power in time along with spanwise distribution of average aerodynamic power injection for various time steps in the CFD solvers for flow case *P100I50*. For EllipSys3D the baseline mesh and IDDES were used. For CFX the baseline mesh and SBES were used.

## 2.2 Turbulence model dependency

### 310 2.2.1 High inclination

The high inclination case has flow coming with inclination angle  $I$  of 50 degree and pitch angle  $P$  of 100 degrees. In this scenario, the shedding is quite correlated for all turbulence models as depicted in Fig. 10, but with the highest degree of correlation for URANS turbulence modelling, as this cannot resolve the small structure vortices. The spanwise power distribution is quite

similar, no matter the turbulence model, and the accumulated power injected to the blade is also close between all methods  
 315 yielding a minimum of 1280W from EllipSys3D URANS and a maximum of 1450W from CFX SAS- see Fig. 9.

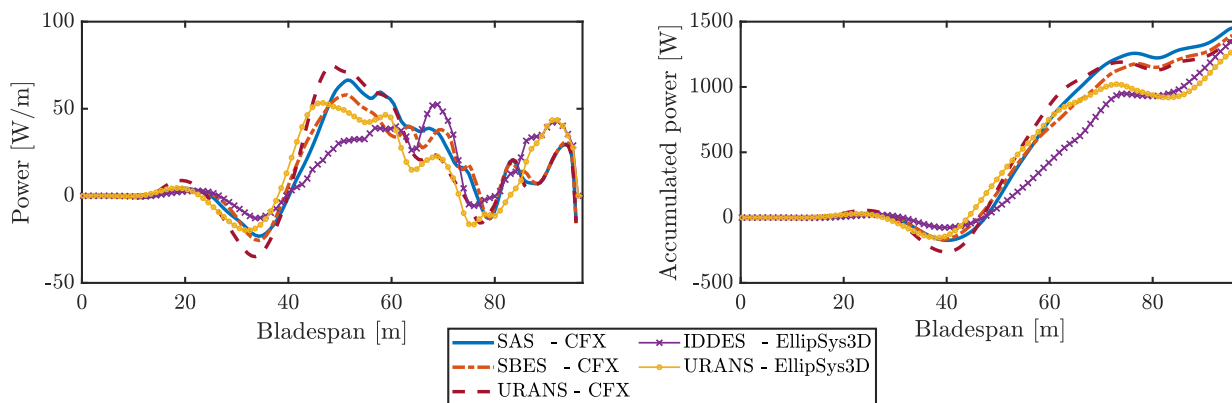

**Figure 9.** Spanwise distribution of aerodynamic power for flow case *P100I50*. Left: average power per cycle  $P_{A,SPAN}$ ; right:  $P_{A,SPAN}$  accumulated over span.

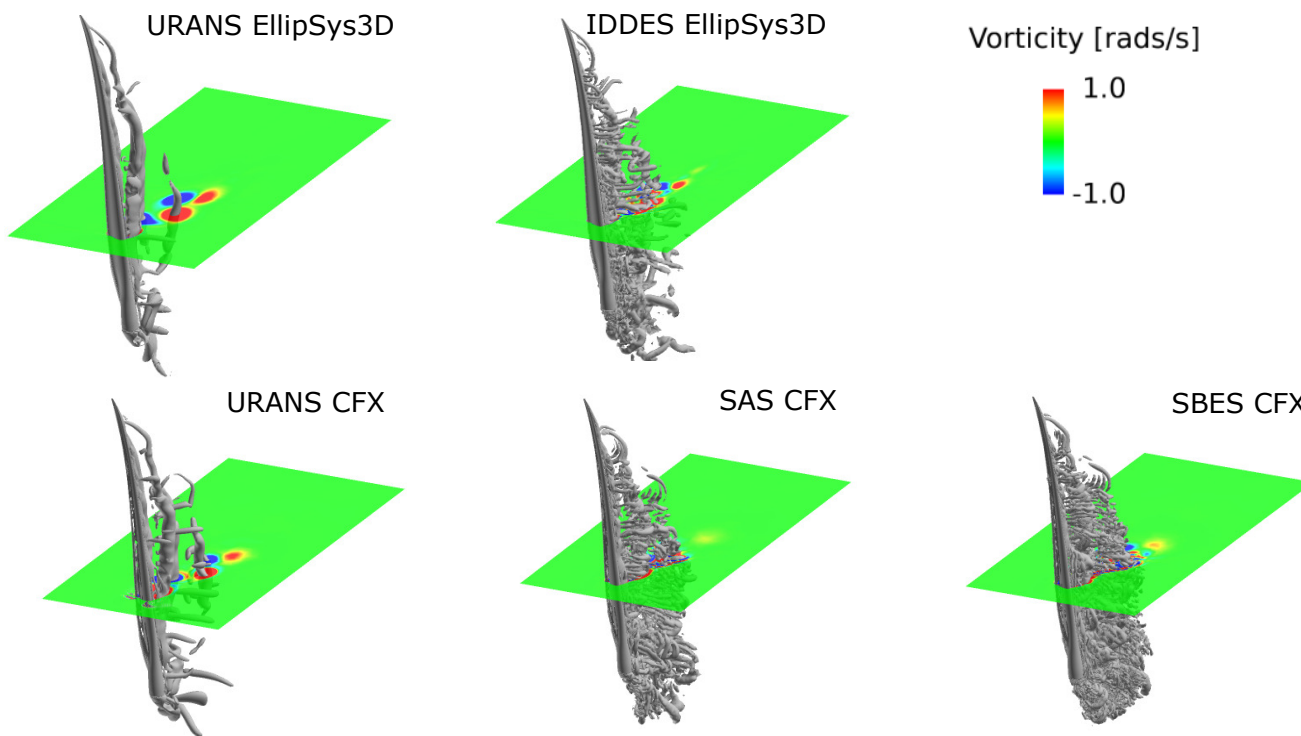

**Figure 10.** Vorticity fields resulting from the used turbulence models along with isosurfaces of  $q$ -criterion = 5.0. Flow case *P100I50*.

### 2.2.2 Low inclination

The low inclination case has flow coming with inclination angle  $I$  of 30 degrees and pitch angle  $P$  of 100 degrees. Here, a large degree of natural, more chaotic, shedding occurs, which is seen to be quite different between the various turbulence models, see Figs. 11 and 12. For IDDES, SAS and SBES a high degree of small scale vortices are ~~shed from the blade~~created, without large scale spatial or temporal correlation.

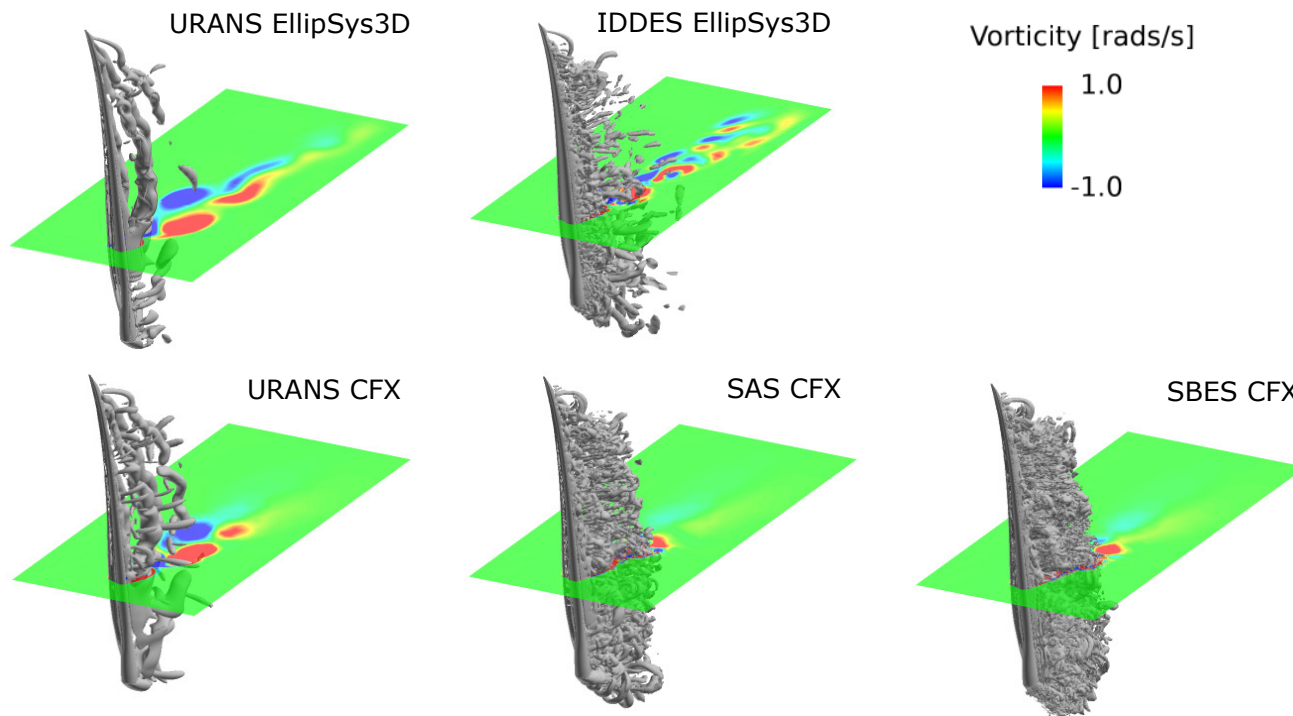

**Figure 11.** Vorticity fields resulting from the used turbulence models along with isosurfaces of  $q$ -criterion = 5.0. Flow case *P100I30*.

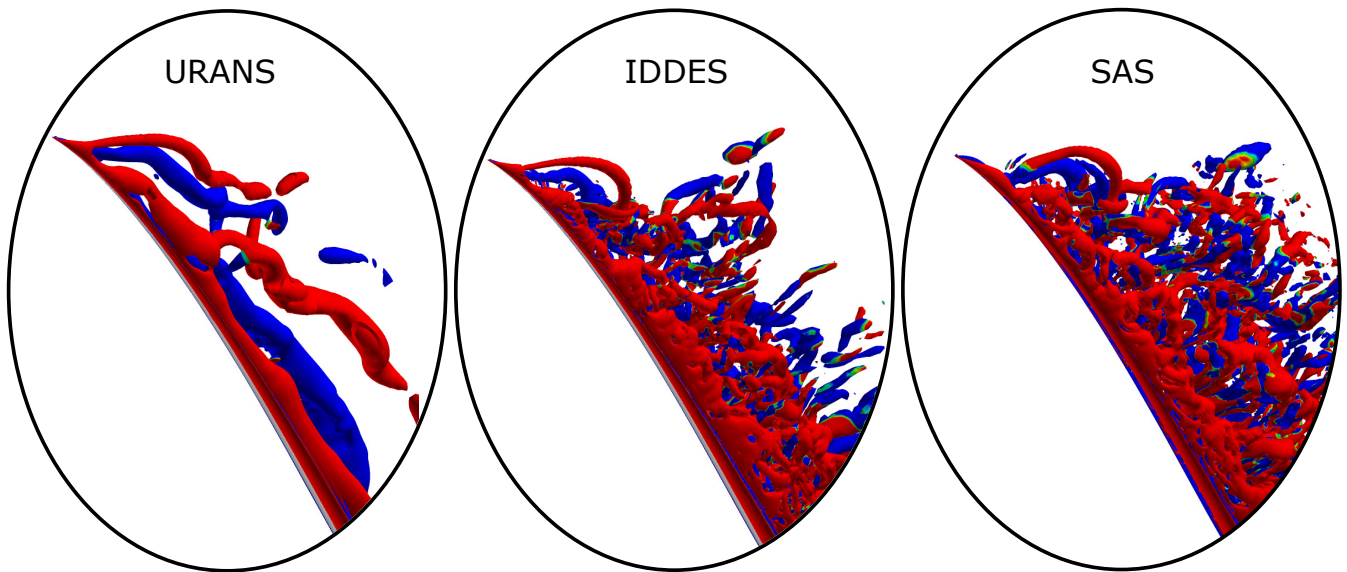

**Figure 12.** Zoom in on outer part of the blade for URANS (DTU setup), IDDES and SAS turbulence. Q-criterion = 20.0 and isosurfaces colored by vorticity between -1 and 1 rad/s. Flow case *P100I30*.

~~This shedding of~~ These small scale vortices result in negative accumulated power along the span. The spanwise power distribution is therefore also much less in agreement between the lower and higher fidelity turbulence models than in the high inclination case. The lower fidelity URANS turbulence models predict high spanwise correlation resulting in a high power injection between 1560W and 2000W. The higher fidelity models, however, predict the situation to be positively damped with an accumulated power of  $\approx -300\text{W}$ , see Fig. 13.

It is important to note that for IDDES, SBES and SAS, this flow case resulted in positive power injection for lower grid resolution - presented in Figs. 6 and 7 depicting the evolution of total aerodynamic power injection according to the grid resolution and turbulence models for this low inclination. In Fig. 7, the URANS seems converged numerically, yet presents results in direct opposition to the one of SBES, SAS and IDDES once grid convergence is achieved. This is likely due to the fact that these higher fidelity models are blending URANS and LES models, and with lower grid resolution, the URANS region is larger meaning the spanwise vortex shedding becomes more correlated for coarser grid resolutions. This shows that URANS, irrespectively of the grid resolution, is not suited for simulating VIV of blades with low inclination flow.

Figures 11 and 12 show the vortices ~~shed from the blade~~ developed in the near wake captured by the various turbulence models. In Fig. 12 the outer approximately 40% of the blade is shown and it is clear how the URANS turbulence model creates much more coherency between the vortices than what is seen for IDDES and SAS, which both create more incoherent natural shedding.



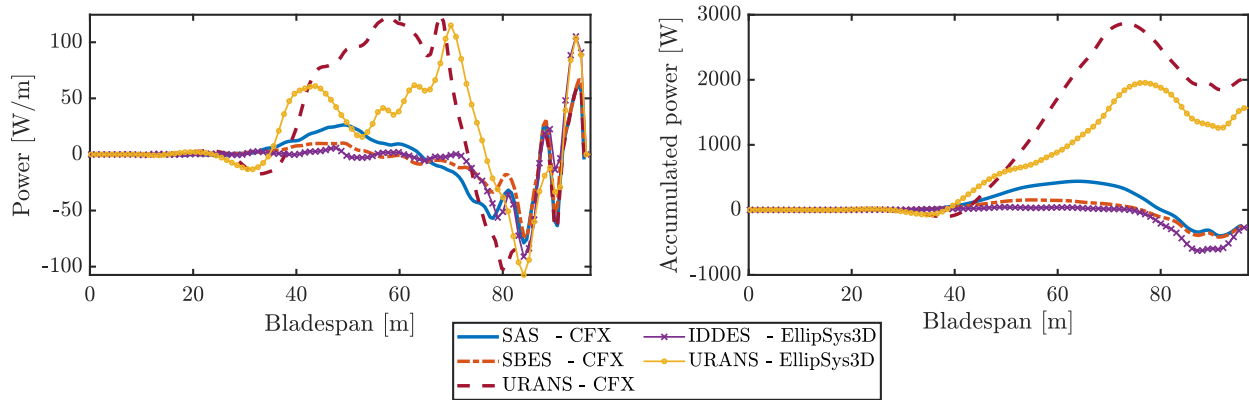

**Figure 13.** Spanwise distribution of aerodynamic power for flow case *P100I30*. Left: average power per cycle  $P_{A,SPAN}$ ; right:  $P_{A,SPAN}$  accumulated over span.

### 2.3 Resulting vibrations

Using both CFD setups, sweeps of amplitudes up to 2m were conducted using the various turbulence models. URANS and IDDES simulations were conducted using the EllipSys3D setup, while SBES and SAS simulations were performed on the CFX  
 340 setup. By these sweeps an approximation of the vibration level can be given, using the structural damping of the considered blade. As presented in Sec. 1.5.2, the power dissipated by structural damping is proportional to the square of the vibration amplitude. For the considered blade a relation between dissipated power and amplitude was found to:  $P_{STRUC} = 495.8 \cdot A_{tip}^2$ . By this relation, an effective power  $P_{EFF} = P_{A,TOT} - P_{STRUC}$  can determine whether the blade is in a stable or unstable situation, as depicted in respectively green and red regions of Fig. 14.

345 As seen, for the high inclination case with  $I = 50^\circ$  a similar trend of effective power is found between the various models varying mostly at higher amplitudes. The equilibrium points of said simulations lie between  $\approx 1.25\text{m}$  for SAS and  $\approx 1.6\text{m}$  for IDDES. For the low inclination case, however, it is again clear that the URANS model results in far from realistic scenarios due to the artificial vortex coherency created. For this flow scenario, all higher fidelity simulations (IDDES, SBES and SAS) lie well within the stable region, meaning that no vibrations should occur. URANS simulations, however, show high injection of  
 350 power all the way to 1.25m amplitude. One could state that this is acceptable as the result is conservative, but note that this was not the case for the high inclination case. A scenario in which higher fidelity turbulence will predict vibrations where URANS turbulence does not, is plausible. However, this scenario, if present, is still to be revealed to the authors.

### 3 Conclusions

A comprehensive study has been conducted, investigating the impacts of various simulation choices for vortex-induced vibra-  
 355 tions of wind turbine blades. Common for all studies was the forced motion CFD approach, where the structural first edgewise

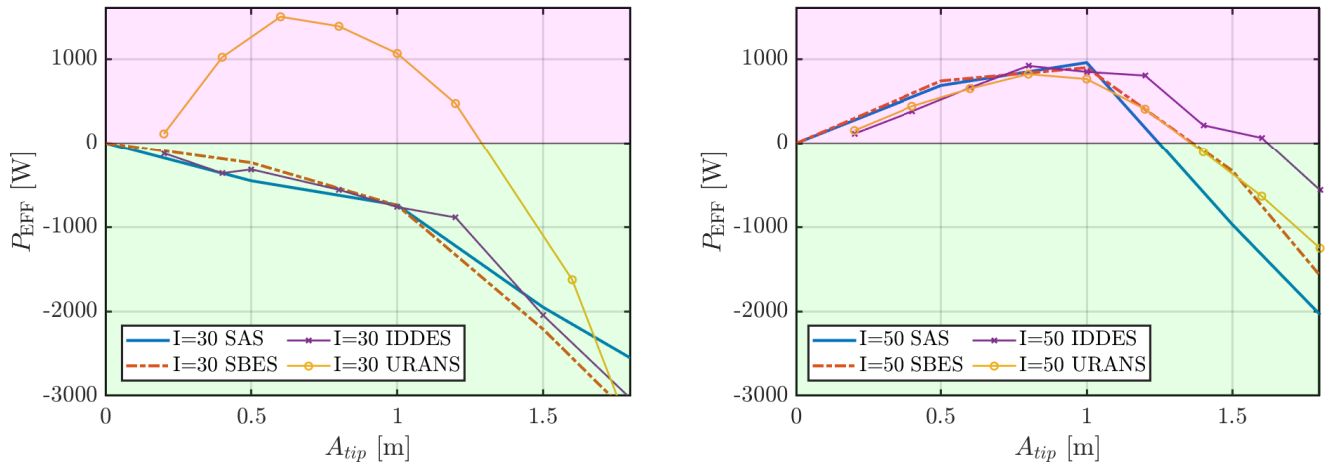

**Figure 14.** Effective power,  $P_{EFF} = P_{A,TOT} - P_{STRUC}$ , for various amplitudes using SAS, SBES, IDDES and URANS turbulence modeling. Flow cases *P100I30* (left) and *P100I50* (right)

mode was imposed as a motion in the CFD simulations, which in earlier work has been shown feasible. Two independent CFD methodologies were used being the DTU in-house EllipSys3D solver and the commercial Ansys CFX solver used at Siemens Gamesa. By this, various grid strategies and turbulence models are tested and compared showing a high degree of sensitivity for especially low inclination flow, meaning spanwise flow closer to perpendicular to the span rather than along the span. It is found that for these inclinations care is needed for the selection of turbulence model and grid. The observed differences are due to the artificial coherency in the vortex structures created by unsteady RANS models, leading to high input of aerodynamic power. For coarse grids, the URANS region of the higher fidelity DES-like turbulence models become too big, leading to similar results as for pure URANS simulations. For finer grids, the higher fidelity models resolve the more chaotic smaller scale vortices, which breaks the coherence and power injection. For higher inclination cases, the sensitivities to grid and turbulence models is much lower, as the degree of chaotic natural shedding is low compared to the coherent structures, which can be resolved fairly well even using URANS turbulence.

This leads to the main conclusion of the present study: A lot of care needs to be taken when simulating vortex-induced vibrations of wind turbine blades. Various conditions will need separate sensitivity investigations in order to ensure the accuracy of the results. This is important since it is otherwise risked that much too heavy computations are conducted for cases that do not need it. Even worse, the computations that were found to be well resolved for one case may fail to predict the VIVs in other cases.

## 4 Future studies

The topic of VIVs becomes increasingly relevant with the increasing sizes of wind turbines, and much more research is needed. As a continuation of the current study, an expansion on the parametric space is needed to make final conclusions on turbulence models and grid requirements. This study shows that the necessity of high fidelity turbulence and fine grids is highly dependent on flow scenario. As of now, no general rule of thumb about how and when to use various models can be justified. This would need a larger mapping of flow cases and rotor designs. However, the tendency seems to be that the need of higher accuracy increases with the degree of natural shedding along the blade, meaning that low inclinations are more difficult to compute correctly.

Even though forced motion simulations have the possibility of being more efficient than fully coupled FSI simulations, the simulation time needed for broad mappings is still high; especially if various amplitudes or flow velocities are needed. By use of reduced order modeling, the needed amount of simulations could possibly be reduced significantly.

The current study only considers clamped single blades undergoing the 1st edgewise blade mode vibration. As wind turbines are coupled systems, the coupled rotor modes should likewise be studied. This highly increases the complexity as the modes of a wind turbine are many, and the motion of the individual blades will then depend on azimuth position.

## Acknowledgments

This work has been supported by the PRESTIGE project (J.no. 9090-00025B), granted by Innovation Fund Denmark. Computational resources were provided by the DTU Risø cluster Sophia (DTU Computing Center, 2021).

## Data availability statement

The geometry and the structural model of the considered wind turbine are publicly available. However, fluid solvers are licensed. The data that support the findings of this study are available upon reasonable request to the corresponding author.

## Author contributions

C. Grinderslev conducted EllipSys3D simulations, did analysis of the results, and did the main writing of the paper. F. Houtin-Mongrolle did the majority of the CFX calculations, analysis, and methodology implementation in CFX as well as participating in the redaction and reviewing of the paper. N. N. Sørensen conducted EllipSys3D simulations, took part in the analysis and reviewing the paper. G. R. Pirrung conducted HAWCSTAB2 analysis, damping estimations, supported on analysis of EllipSys3D simulations and reviewed the paper. Valuable support was provided by P. Jacobs, A. Ahmed and B. Duboc regarding the analysis of CFX results, methodology implementation in CFX, and reviewing the paper. All authors contributed in editing the paper.

#### 400 **Competing interests**

The authors declare that there are no competing interests.

## References

- Bortolotti, P., Canet Tarrés, H., Dykes, K., Merz, K., Sethuraman, L., Verelst, D., and Zahle, F.: Systems Engineering in Wind Energy - WP2.1 Reference Wind Turbines, Tech. rep., National Renewable Energy Laboratory (NREL), <https://www.osti.gov/biblio/1529216-iea-wind-tcp-task-systems-engineering-wind-energy-wp2-reference-wind-turbines>, 2019.
- CFX, A.: Modeling guide, Release 21R2, 2021.
- CFX-Solver, A.: Theory guide, Release 21R2, 2021.
- DTU Computing Center: DTU Computing Center resources, <https://doi.org/10.48714/DTU.HPC.0001>, 2021.
- Egorov, Y., Menter, F., Lechner, R., and Cokljat, D.: The scale-adaptive simulation method for unsteady turbulent flow predictions. part 2: Application to complex flows, *Flow, Turbulence and Combustion*, 85, 139–165, <https://doi.org/10.1007/s10494-010-9265-4>, 2010.
- Grinderslev, C., Nørmark Sørensen, N., Raimund Pirrung, G., and González Horcas, S.: Multiple limit cycle amplitudes in high-fidelity predictions of standstill wind turbine blade vibrations, *Wind Energy Science*, 7, 2201–2213, <https://doi.org/10.5194/wes-7-2201-2022>, 2022.
- Gritskevich, M. S., Garbaruk, A. V., Schütze, J., and Menter, F. R.: Development of DDES and IDDES formulations for the  $k-\omega$  shear stress transport model, *Flow, Turbulence and Combustion*, 88, 431–449, <https://doi.org/10.1007/s10494-011-9378-4>, 2012.
- Hansen, M. H.: Aeroelastic stability analysis of wind turbines using an eigenvalue approach, *Wind Energy*, 7, 133–143, <https://doi.org/https://doi.org/10.1002/we.116>, 2004.
- Heinz, J., Sørensen, N., and Zahle, F.: Fluid-structure interaction computations for geometrically resolved rotor simulations using CFD, *Wind Energy*, 19, 2205–2221, 2016.
- Horcas, S. G., Barlas, T., Zahle, F., and Sørensen, N.: Vortex induced vibrations of wind turbine blades: Influence of the tip geometry, *Physics of Fluids*, 32, 065 104, <https://doi.org/10.1063/5.0004005>, 2020.
- Horcas, S. G., Madsen, M., Sørensen, N.N. Zahle, F., and Barlas, T.: Influence of the installation of a trailing edge flap on the vortex induced vibrations of a wind turbine blade, *Journal of Wind Engineering and Industrial Aerodynamics*, 229, 105 118, <https://doi.org/https://doi.org/10.1016/j.jweia.2022.105118>, 2022a.
- Horcas, S. G., Sørensen, N., Zahle, F., Pirrung, G. R., and Barlas, T.: Vibrations of wind turbine blades in standstill: Mapping the influence of the inflow angles, *Physics of Fluids*, 34, <https://doi.org/10.1063/5.0088036>, 2022b.
- Hu, P., Sun, C., Zhu, X., and Du, Z.: Investigations on vortex-induced vibration of a wind turbine airfoil at a high angle of attack via modal analysis, *Journal of Renewable and Sustainable Energy*, 13, <https://doi.org/10.1063/5.0040509>, 2021.
- Jasak, H., Weller, H., and Gosman, A.: High resolution NVD differencing scheme for arbitrarily unstructured meshes, *International journal for numerical methods in fluids*, 31, 431–449, 1999.
- Leonard, B.: The ULTIMATE conservative difference scheme applied to unsteady one-dimensional advection, *Computer methods in applied mechanics and engineering*, 88, 17–74, 1991.
- Menter, F.: Zonal Two Equation Kappa-Omega Turbulence Models for Aerodynamic Flows, 1993.
- Menter, F.: Stress-Blended Eddy Simulation (SBES)—A New Paradigm in Hybrid RANS-LES Modeling, in: *Progress in Hybrid RANS-LES Modelling*, edited by Hoarau, Y., Peng, S.-H., Schwamborn, D., and Revell, A., pp. 27–37, Springer International Publishing, Cham, 2018.
- Menter, F., Kuntz, M., and Langtry, R.: Ten years of industrial experience with the SST turbulence model, *Heat and Mass Transfer*, 4, 2003.
- Michelsen, J.: Basis3D - A Platform for Development of Multiblock PDE Solvers., Tech. rep., Risø National Laboratory, 1992.
- Michelsen, J.: Block Structured Multigrid Solution of 2D and 3D Elliptic PDE's., Tech. rep., Technical University of Denmark, 1994.

- Paz, M.: Structural dynamics: theory and computation, Springer Science & Business Media, 2012.
- 440 Placzek, A., Sigrist, J. F., and Hamdouni, A.: Numerical simulation of an oscillating cylinder in a cross-flow at low Reynolds number: Forced and free oscillations, *Computers and Fluids*, 38, 80–100, <https://doi.org/10.1016/j.compfluid.2008.01.007>, 2009.
- Raw, M.: Robustness of coupled algebraic multigrid for the Navier-Stokes equations, in: 34th Aerospace sciences meeting and exhibit, p. 297, 1996.
- Riva, R., Horcas, S. G., Sørensen, N. N., Grinderslev, C., and Pirrung, G. R.: Stability analysis of vortex-induced vibrations on wind turbines, *Journal of Physics: Conference Series*, 2265, <https://doi.org/10.1088/1742-6596/2265/4/042054>, 2022.
- 445 Shur, M. L., Spalart, P. R., Strelets, M. K., and Travin, A. K.: A hybrid RANS-LES approach with delayed-DES and wall-modelled LES capabilities, *International Journal of Heat and Fluid Flow*, 29, 1638–1649, <https://doi.org/10.1016/j.ijheatfluidflow.2008.07.001>, 2008.
- Skrzypiński, W., Gaunaa, M., Sørensen, N., Zahle, F., and Heinz, J.: Vortex-induced vibrations of a DU96-W-180 airfoil at 90° angle of attack, *Wind Energy*, 17, 1495–1514, <https://doi.org/https://doi.org/10.1002/we.1647>, 2014.
- 450 Strelets, M.: Detached eddy simulation of massively separated flows, 39th Aerospace Sciences Meeting and Exhibit, 2001.
- Sørensen, N.: General purpose flow solver applied to flow over hills., Ph.D. thesis, 1995.
- Sørensen, N.: HypGrid2D. A 2-d mesh generator, Tech. rep., Risø National Laboratory, 1998.
- Viré, A., Derksen, A., Folkersma, M., and Sarwar, K.: Two-dimensional numerical simulations of vortex-induced vibrations for a cylinder in conditions representative of wind turbine towers, *Wind Energy Science*, 5, 793–806, <https://doi.org/10.5194/wes-5-793-2020>, 2020.
- 455 Zahle, F.: PGL - Parametric Geometry Library, <https://gitlab.windenergy.dtu.dk/frza/PGL>, 2022.
